# Supplementary material for: SseK3 Is a Salmonella Effector That Binds TRIM32 and Modulates the Host’s NF-κB Signalling Activity
Source: PubMed Central journal article supplement (PMC4579058; doi:10.1371/journal.pone.0138529), 2015-09-22
Supplement: pone.0138529.s001.pdf [file pone.0138529.s001.pdf]

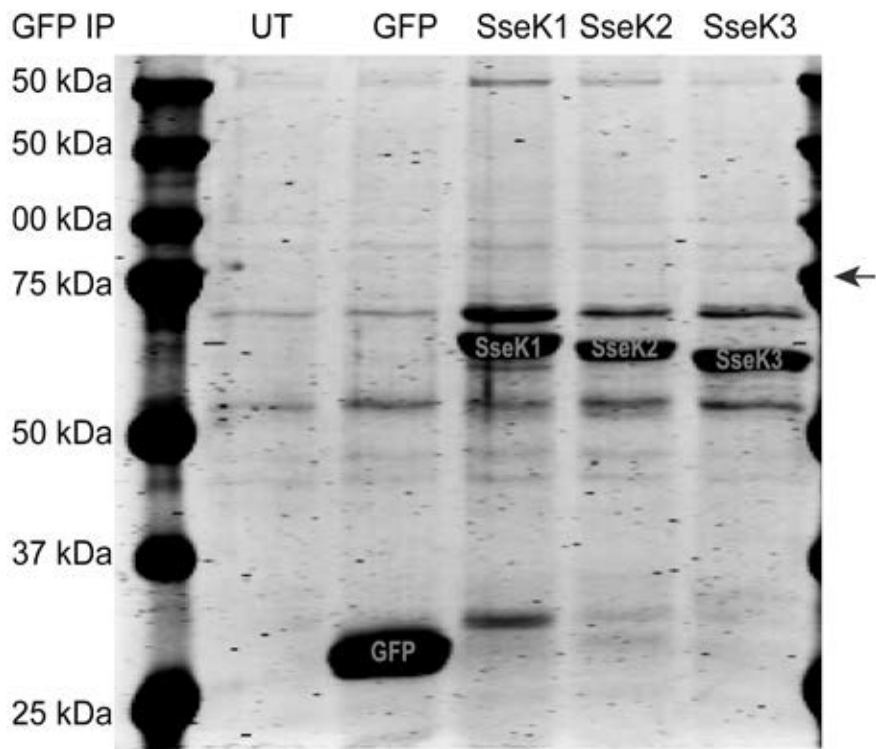

Supplementary Figure 1
